# Supplementary material
Source: HighWire-hosted journal article supplement (https://openheart.bmj.com/content/6/1/e000968)
Supplement: inline-supplementary-material-1 [file inline-supplementary-material-1.docx]

**Supplemental Appendix**

**Diastolic-systolic velocity ratio to detect coronary stenoses under physiological resting conditions: A mechanistic study**

Guus A de Waard MD1, 2, Christopher J. Broyd MD, PhD2, Christopher M Cook MD2, Nina W. van der Hoeven MD1, Ricardo Petraco MD2, Sukhjinder S Nijjer MBChB2, Tim P van de Hoef MD PhD3, Mauro Echavarria-Pinto MD PhD4,Sayan Sen MBBS PhD2, Paul Knaapen MD PhD1, Javier Escaned MD PhD4, Jan J Piek MD PhD3,Niels van Royen MD PhD1, 6, Justin E Davies MBBS PhD2

**Supplemental Figure 1 – Correlation between FFR and DSVR in cohort 1:**

**
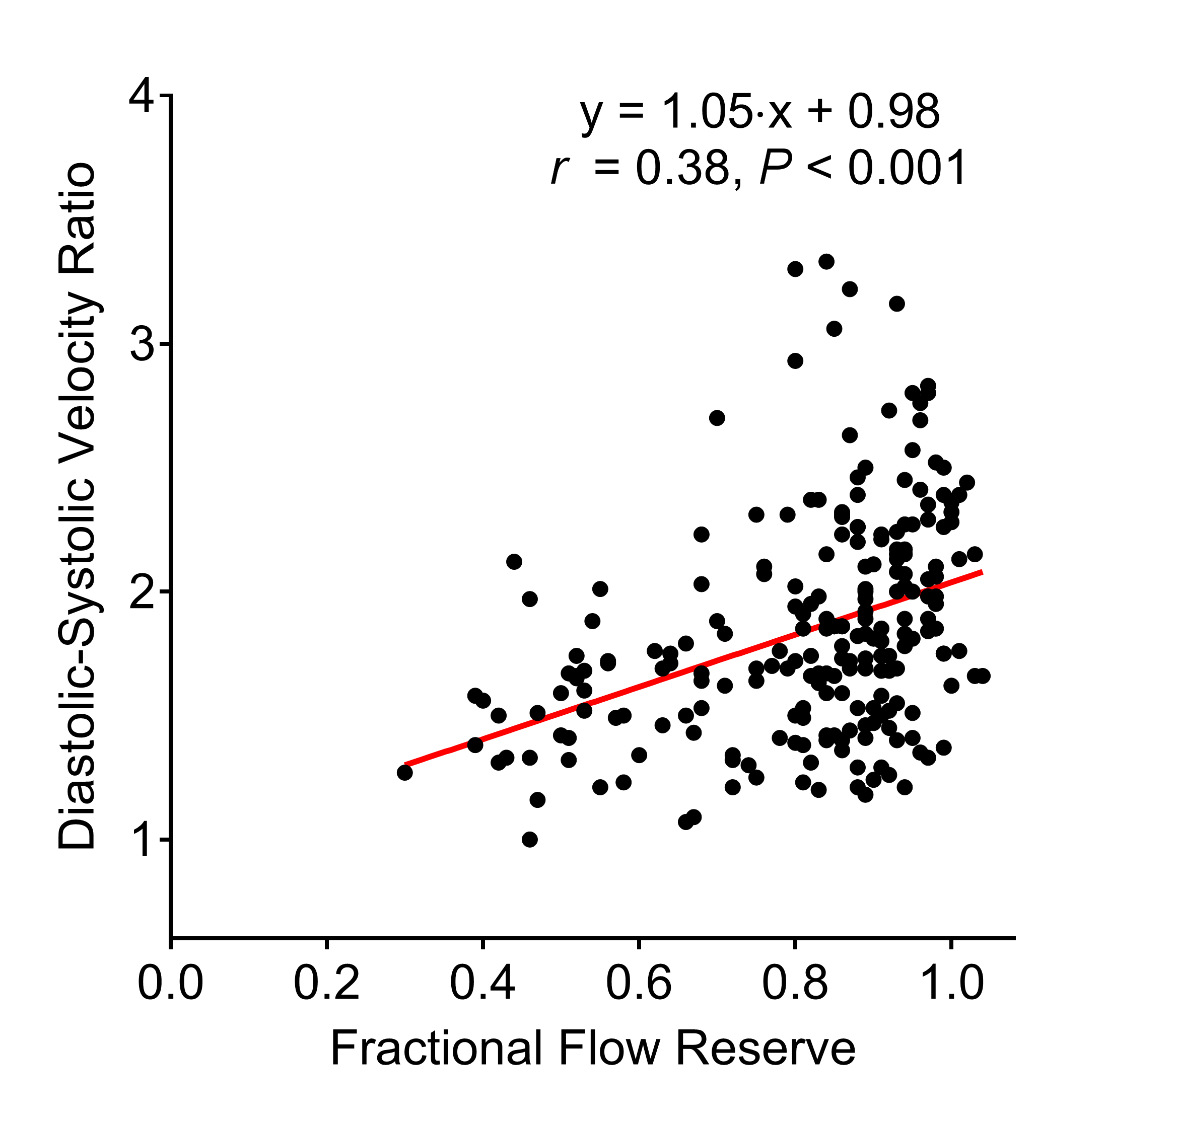
**

In this figure, the correlation between FFR and DSVR is shown.

Abbreviations – DSVR: diastolic-systolic velocity ratio, FFR: fractional flow reserve

**Supplemental Figure 2 – DSVR according to iFR in cohort 1:**

**
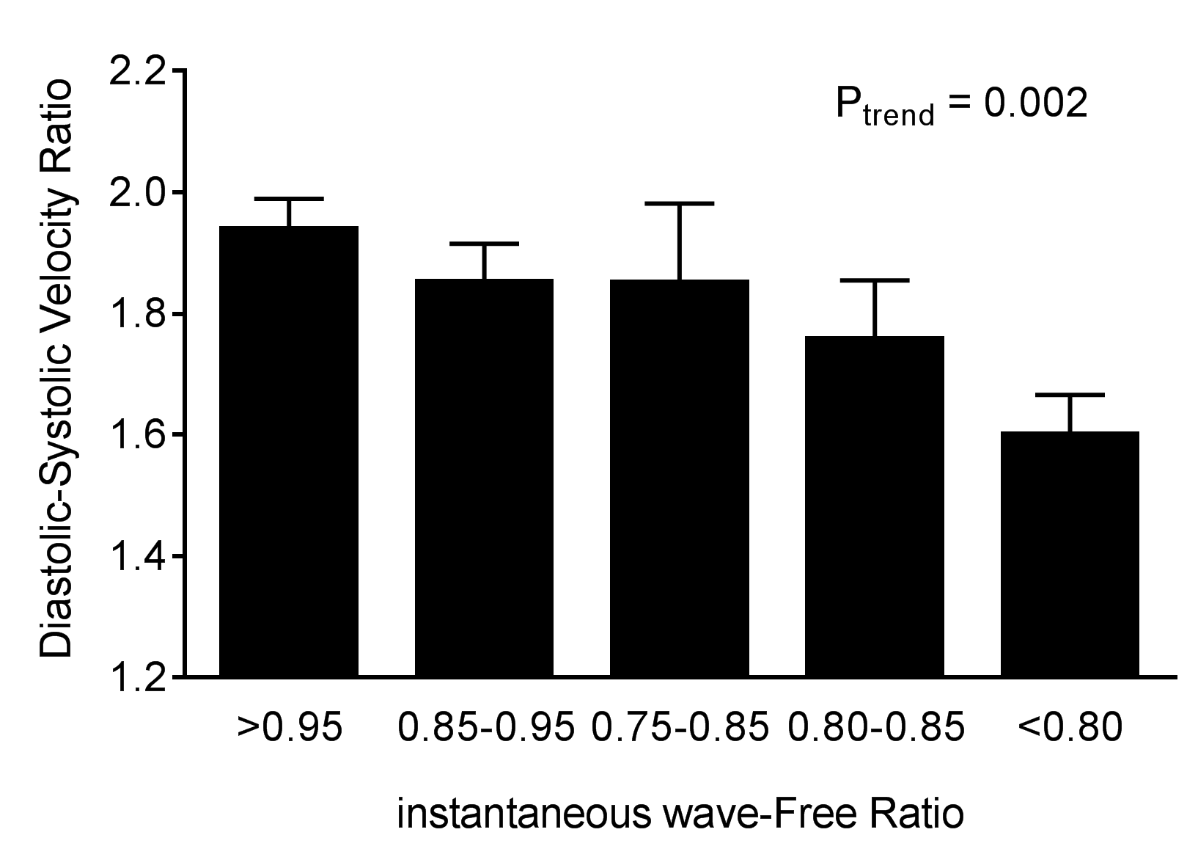
**

Bars represent mean and error bars represent standard error of the mean.

Abbreviations – DSVR: diastolic-systolic velocity ratio, iFR: instantaneous wave-free ratio

Methodology for calculation of the instantaneous wave-free ratio[1]:

**Supplemental Figure 3 – DSVR according to HSR in cohort 1:**

**
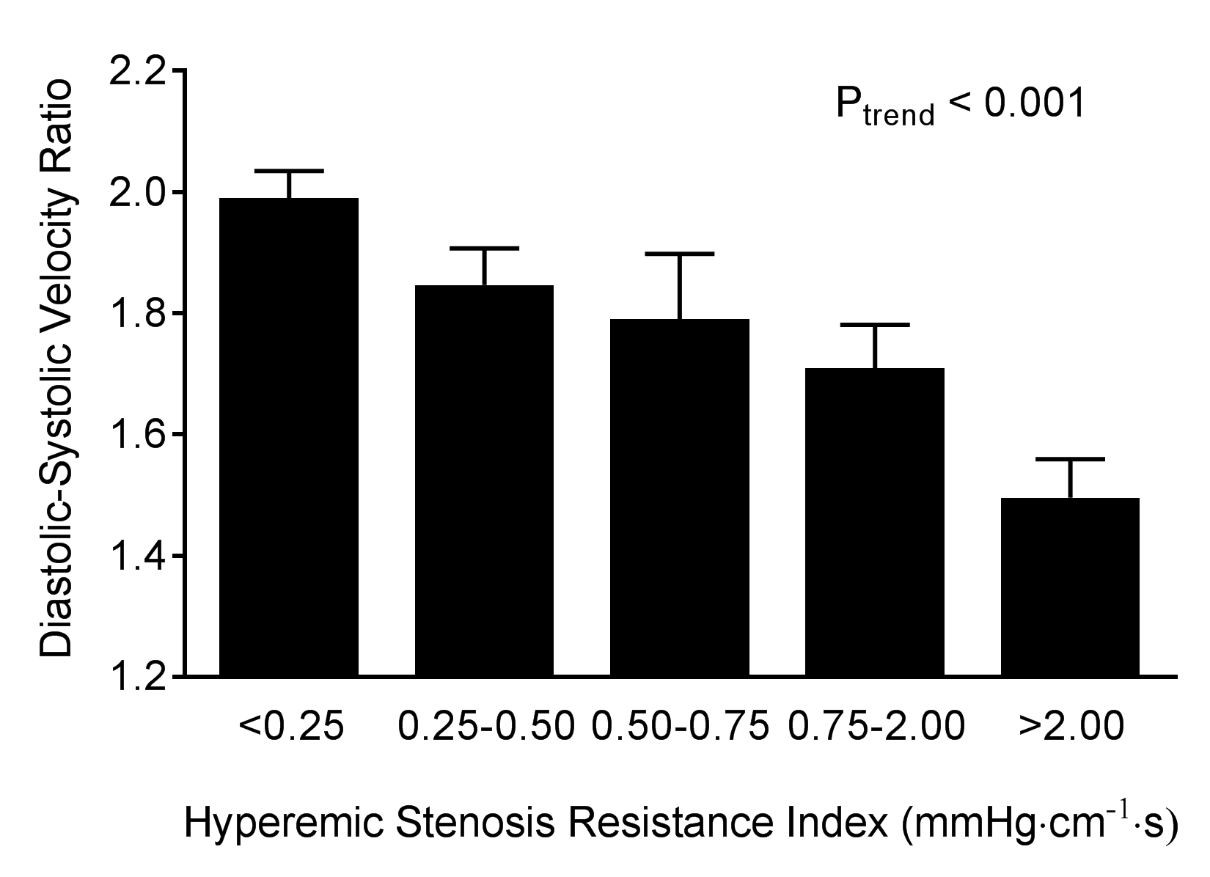
**

Bars represent mean and error bars represent standard error of the mean.

Abbreviations – DSVR: diastolic-systolic velocity ratio, HSR: hyperemic stenosis resistance index

Methodology for calculation of the hyperemic stenosis resistance index[2]:

**Reference list:**

1 Sen S, Escaned J, Malik IS, et al. Development and validation of a new adenosine-independent index of stenosis severity from coronary wave-intensity analysis: results of the ADVISE (ADenosine Vasodilator Independent Stenosis Evaluation) study. *J Am Coll Cardiol* 2012;**59**:1392-402.

2 Meuwissen M, Siebes M, Chamuleau SA, et al. Hyperemic stenosis resistance index for evaluation of functional coronary lesion severity. *Circulation* 2002;**106**:441-6.
